# Supplementary material
Source: PubMed Central journal article supplement (PMC3654401)
Supplement: NIHMS449439-supplement-02.pdf [file NIHMS449439-supplement-02.pdf]

**Appendix Figure 1. Vegetables (4<sup>th</sup> vs. 1<sup>st</sup> quartile)**

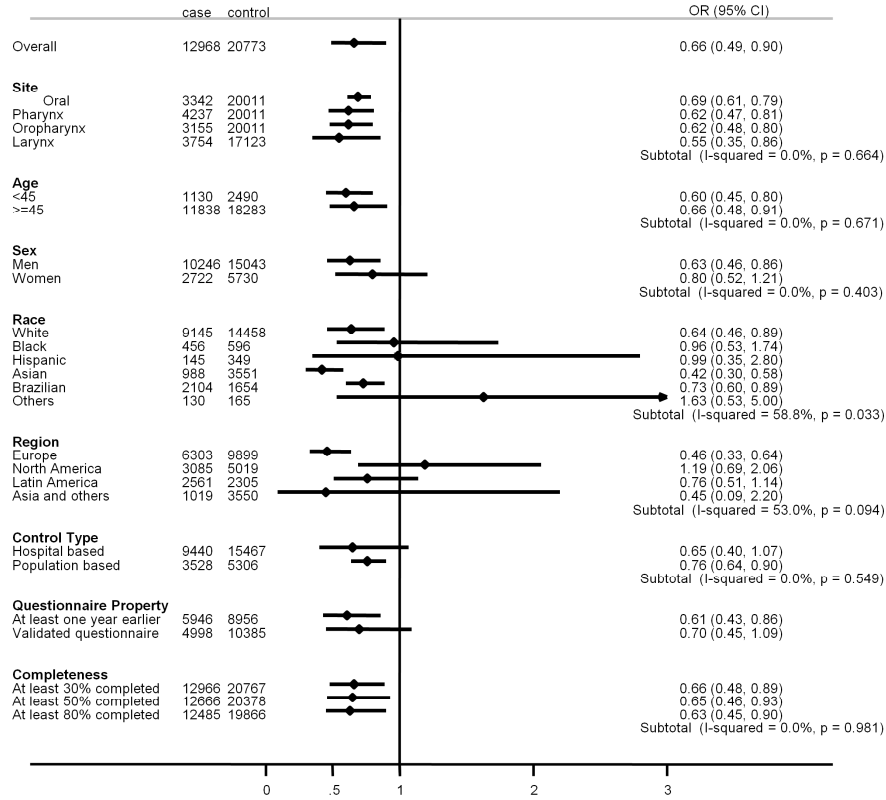

**Appendix Figure 2. Fruit (4<sup>th</sup> vs. 1<sup>st</sup> quartile)**

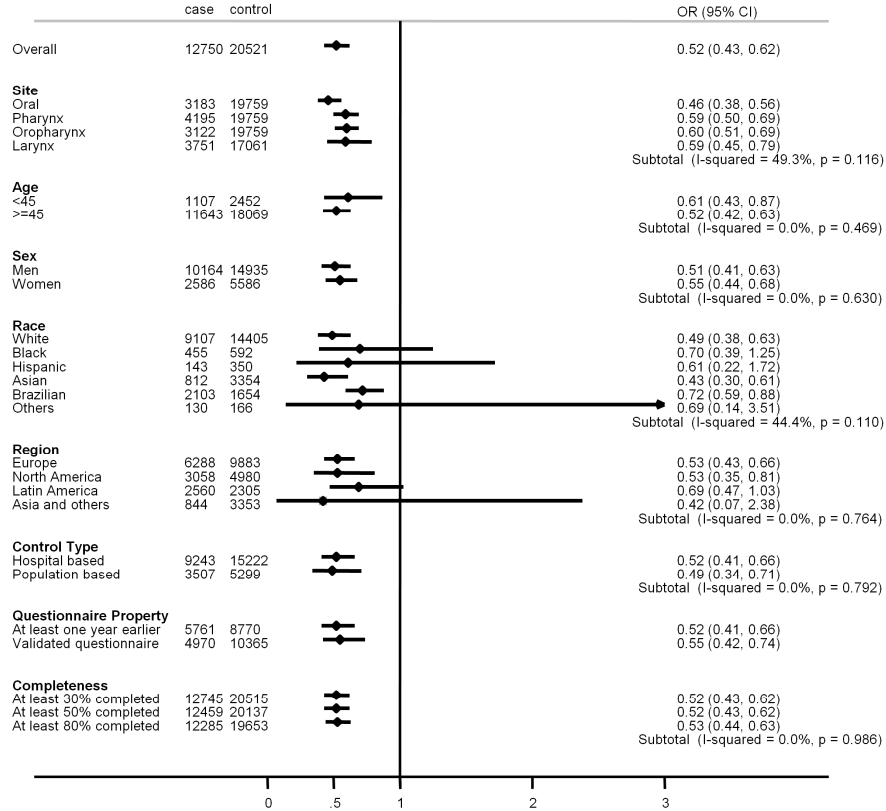

**Appendix Figure 3. Red meat (4<sup>th</sup> vs. 1<sup>st</sup> quartile)**

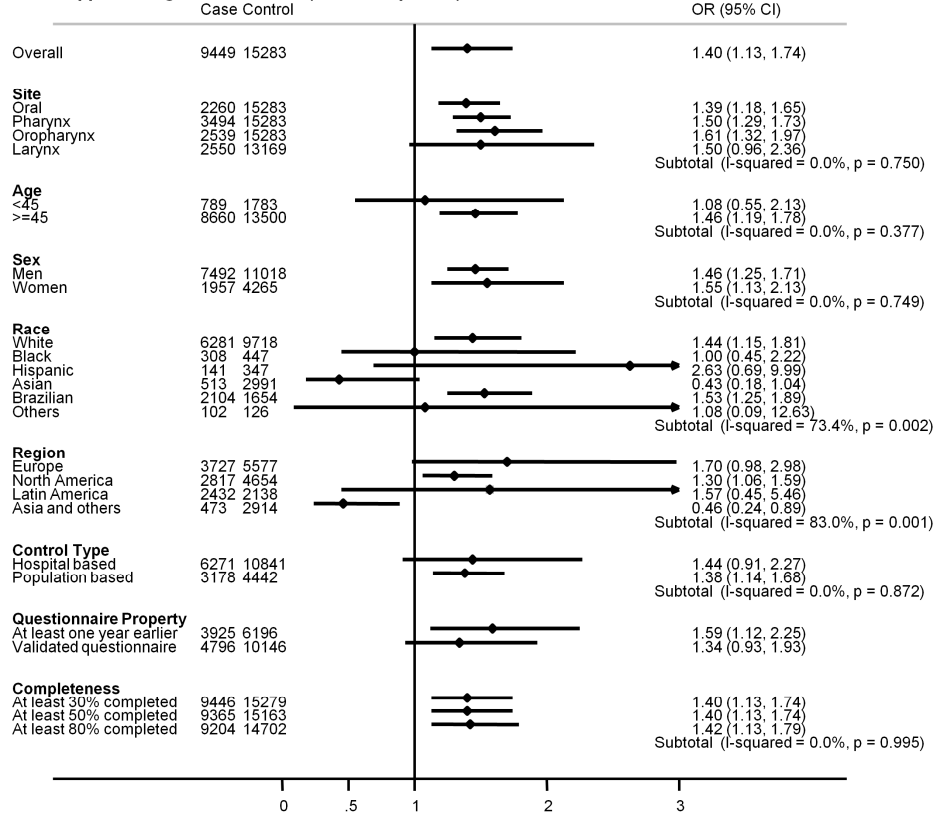

**Appendix Figure 4. White meat (4<sup>th</sup> vs. 1<sup>st</sup> Quartile)**

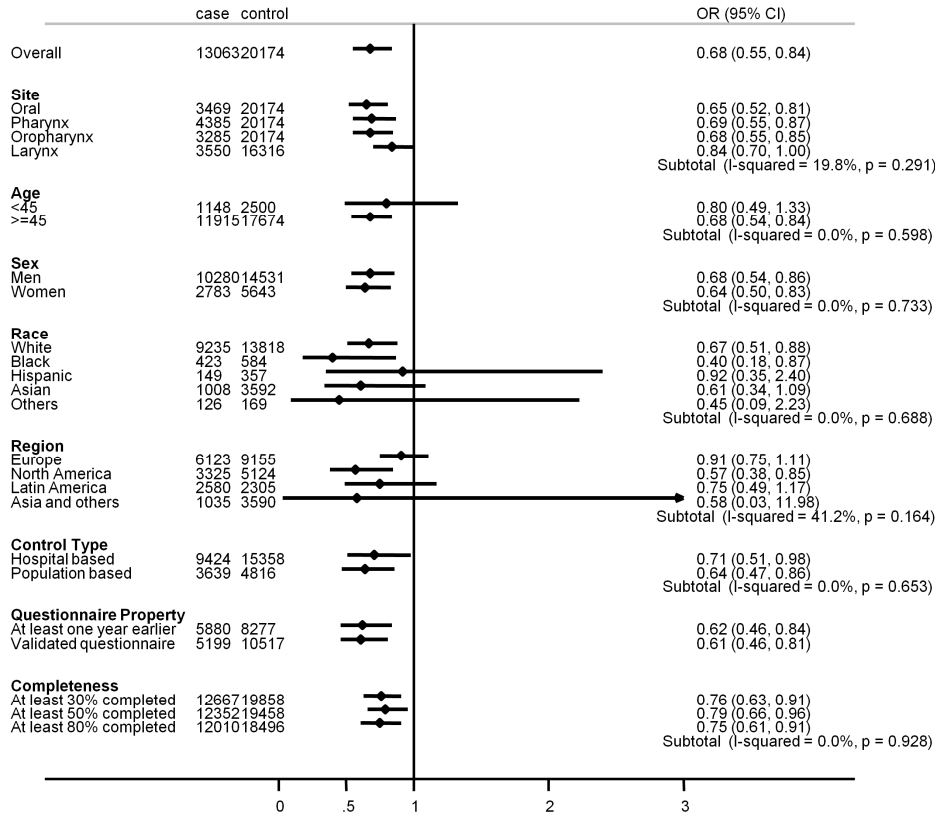

**Appendix Figure 5. Processed meat (4<sup>th</sup> vs. 1<sup>st</sup> Quartile)**

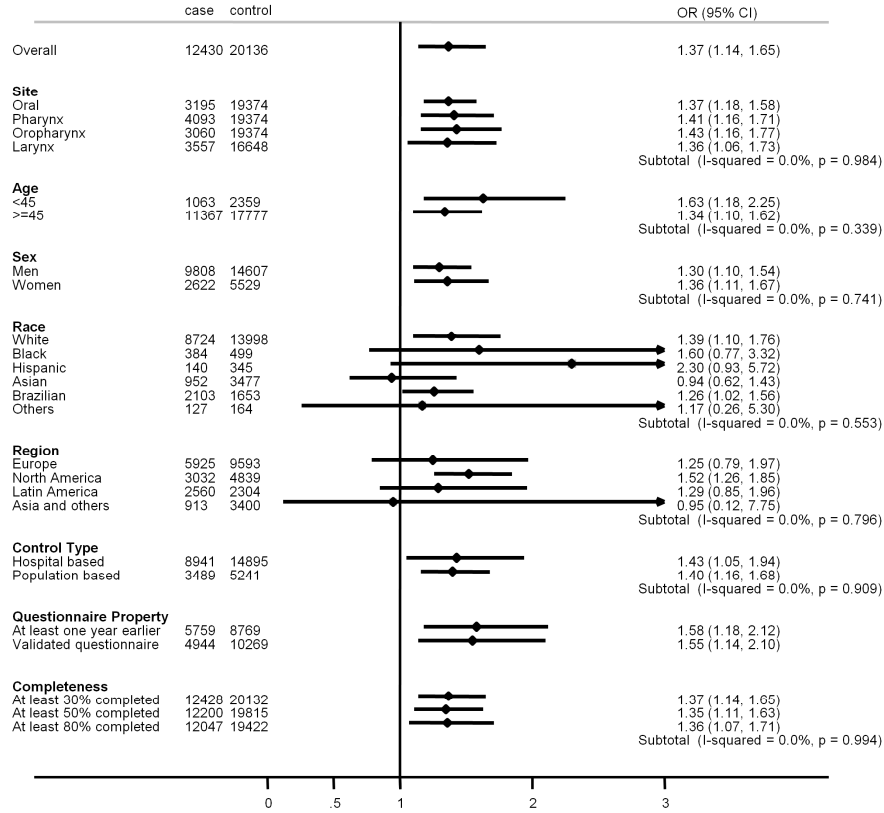

**Appendix Figure 6. Scores\* (every one score increase)**

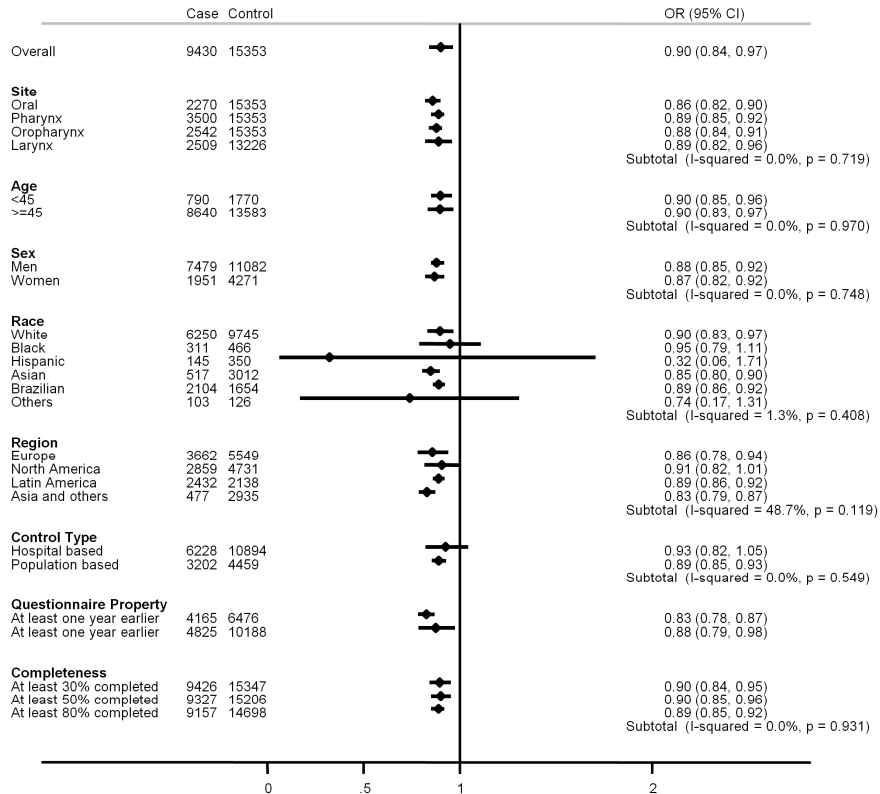

\*High score indicates higher frequency of fruit and vegetable intake and lower frequency of red meat intake

**Table 1.** Summary of individual studies in INHANCE consortium pooled data version 1.3, by region and study period\*

| Study Location (Reference†)                                                                           | Recruitment period | Case subjects   |                       |                        |       | Control subjects‡                                            |                       |       |
|-------------------------------------------------------------------------------------------------------|--------------------|-----------------|-----------------------|------------------------|-------|--------------------------------------------------------------|-----------------------|-------|
|                                                                                                       |                    | Source          | Participation rate, % | Age eligibility, years | Total | Source                                                       | Participation rate, % | Total |
| <b>Europe</b>                                                                                         |                    |                 |                       |                        |       |                                                              |                       |       |
| Milan, Italy                                                                                          | 1984–1989          | Hospital        | 95§                   | <80                    | 416   | Hospital (unhealthy)                                         | 95§                   | 1531  |
| Aviano, Italy                                                                                         | 1984–1989          | Hospital        | >95§                  | >18                    | 482   | Hospital (unhealthy)                                         | 95§                   | 855   |
| Paris, France                                                                                         | 1987–1992          | Hospital        | 95§                   | NA                     | 323   | Hospital (unhealthy)                                         | 95§                   | 234   |
| Italy (Aviano, Milan, Latina)¶                                                                        | 1990–1999          | Hospital        | >95                   | 18–80                  | 1058  | Hospital (unhealthy)                                         | 95                    | 2579  |
| Switzerland                                                                                           | 1991–1997          | Hospital        | 95                    | <80                    | 516   | Hospital (unhealthy)                                         | 95                    | 883   |
| Central Europe (Banska Bystrica, Bucharest, Budapest, Lodz, Moscow)¶                                  | 1998–2003          | Hospital        | 96                    | ≥15                    | 762   | Hospital (unhealthy)                                         | 97                    | 907   |
| Rome                                                                                                  | 2002–2007          | Hospital        | 98                    | NA                     | 275   | Hospital (unhealthy)                                         | 94                    | 294   |
| Western Europe                                                                                        | 2002–2005          | Hospital        | 82                    | 18–98                  | 1728  | Hospital (unhealthy)**                                       | 68                    | 1993  |
| Saarland, Germany                                                                                     | 2001–2003          | Hospital        |                       | 50–75                  | 94    | General health exam                                          |                       | 94    |
| Heidelberg, Germany                                                                                   | 1998–2000          | Hospital        | 96                    | <80                    | 252   | Population registries                                        | 62                    | 769   |
| <b>North America</b>                                                                                  |                    |                 |                       |                        |       |                                                              |                       |       |
| Seattle, WA                                                                                           | 1985–1995          | Cancer registry | 54.4, 63.3¶           | 18–65                  | 407   | Random digit dialing                                         | 63, 61¶               | 607   |
| North Carolin                                                                                         | 1994–1997          | Hospital        | 88                    | >17                    | 180   | Hospital (unhealthy)                                         | 86                    | 202   |
| Tampa, F                                                                                              | 1994–2003          | Hospital        | 98                    | ≥18                    | 207   | Cancer screening clinic (healthy)                            | 90                    | 897   |
| Los Angeles, CA                                                                                       | 1999–2004          | Cancer registry | 49                    | 18–65                  | 417   | Neighborhood                                                 | 67.5                  | 1005  |
| Boston, MA                                                                                            | 1999–2003          | Hospital        | 88.7                  | ≥18                    | 584   | Resident list                                                | 48.7                  | 659   |
| US multicenter                                                                                        | 1984–1985          | Cancer Registry | 75                    | 18–79                  | 1114  | Random digit dialing<br>Health Care Financing Administration | 76                    | 1268  |
| MSKCC, NY                                                                                             | 1992–1994          | Hospital        |                       |                        | 134   | Blood bank                                                   |                       | 169   |
| Seattle-LEO, WA                                                                                       | 1983–1987          | Cancer Registry | 81                    | 20–74                  | 573   | Random digit dialing                                         | 75                    | 445   |
| <b>Latin America</b>                                                                                  |                    |                 |                       |                        |       |                                                              |                       |       |
| Puerto Rico                                                                                           | 1992–1995          | Cancer registry | 71                    | 21–79                  | 350   | Residential records                                          | 83                    | 521   |
| Latin America (Buenos Aires, Havana, Goiânia, Pelotas, Porto Alegre, Rio de Janeiro, São Paulo)¶ (NA) | 2000–2003          | Hospital        | 95                    | 15–79                  | 2191  | Hospital (unhealthy)                                         | 86                    | 1706  |
| <b>Asia and others</b>                                                                                |                    |                 |                       |                        |       |                                                              |                       |       |
| Japan                                                                                                 | 2001–2005          | Hospital        | 61                    | 20–79                  | 526   | Hospital (unhealthy)                                         | 41                    | 3102  |
| <b>International</b>                                                                                  |                    |                 |                       |                        |       |                                                              |                       |       |
| International (Italy, Spain, Ireland, Poland, Canada, Australia, Cuba, India, Sudan)¶                 | 1992–1997          | Hospital        | 88.7                  | NA                     | 1559  | Hospital/<br>Community                                       | 87.3                  | 1676  |

\*INHANCE = International Head and Neck Cancer Epidemiology; NA = not applicable/non available.

†: Representative publication in which study methods are described.

‡: All studies frequency matched control subjects to case subjects on age and sex. Additional frequency matching factors included study center (Italy, Central Europe, South America, and International multicenter studies), hospital (France study), ethnicity (Tampa study), and neighborhood (Los Angeles study).

§: Participation rate was not formally assessed, estimated response rate reported.

¶: Multicenter study.

¶: Two response rates are reported because data were collected in two population-based case-control studies, the first from 1985–1989 among men and the second from 1990–1995 among men and women

\*\* The 3 UK centers (Glasgow, Manchester, and Newcastle) from the Western European study were chosen from the same family medical practice (population-based).
